# Supplementary material for: Byproducts of Globe Artichoke and Cauliflower Production as a New Source of Bioactive Compounds in the Green Economy Perspective: An NMR Study
Source: Molecules. 2023 Jan 31;28(3):1363. doi: 10.3390/molecules28031363 (PMC9919138; doi:10.3390/molecules28031363)
Supplement: Supplementary file 1 [file molecules-28-01363-s001.zip › molecules-2143642-supplementary.pdf]

# Byproducts of Globe Artichoke and Cauliflower Production as a New Source of Bioactive Compounds in the Green Economy Perspective: An NMR Study

Cinzia Ingallina <sup>1,†</sup>, Giacomo Di Matteo <sup>1,†</sup>, Mattia Spano <sup>1</sup>, Erica Acciaro <sup>2</sup>, Enio Campiglia <sup>3</sup>, Luisa Mannina <sup>1</sup> and Anatoly Petrovich Sobolev <sup>2,\*</sup>

<sup>1</sup> Department of Chemistry and Technology of Drugs, Food Chemistry Lab, Sapienza University of Rome, P.le Aldo Moro 5, 00185 Rome, Italy

<sup>2</sup> “Annalaura Segre” Magnetic Resonance Laboratory, Institute for Biological Systems, CNR, Via Salaria, Km 29,300, 00015 Monterotondo, Italy

<sup>3</sup> Department of Agricultural and Forest Sciences, University of Tuscia, Via San Camillo de Lellis, snc, 01100 Viterbo, Italy

\* Correspondence: anatoly.sobolev@cnr.it

† These authors contributed equally to this work.

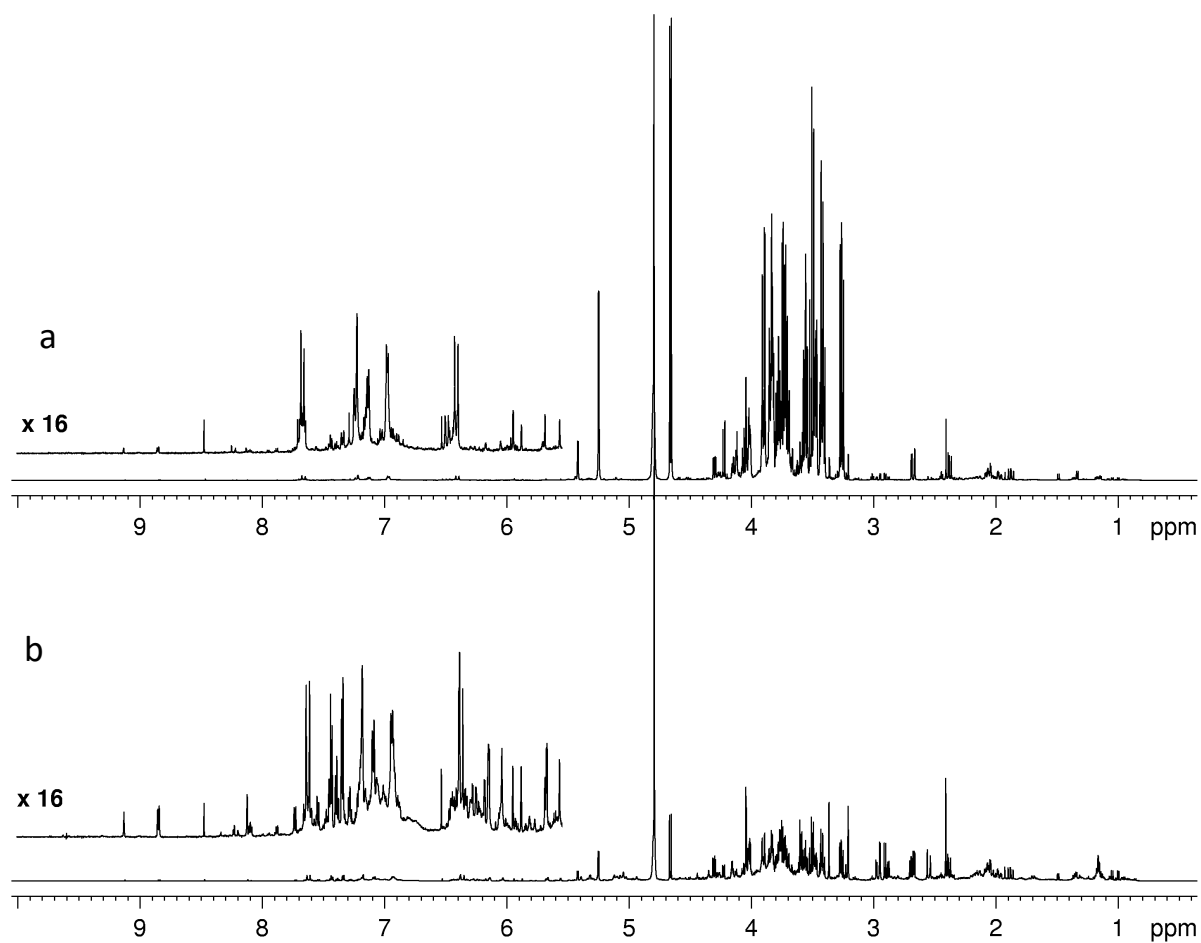

**Figure S1.**  $^1\text{H}$  NMR spectra of aqueous extract from globe artichoke byproducts: stalks (a) and leaves (b).

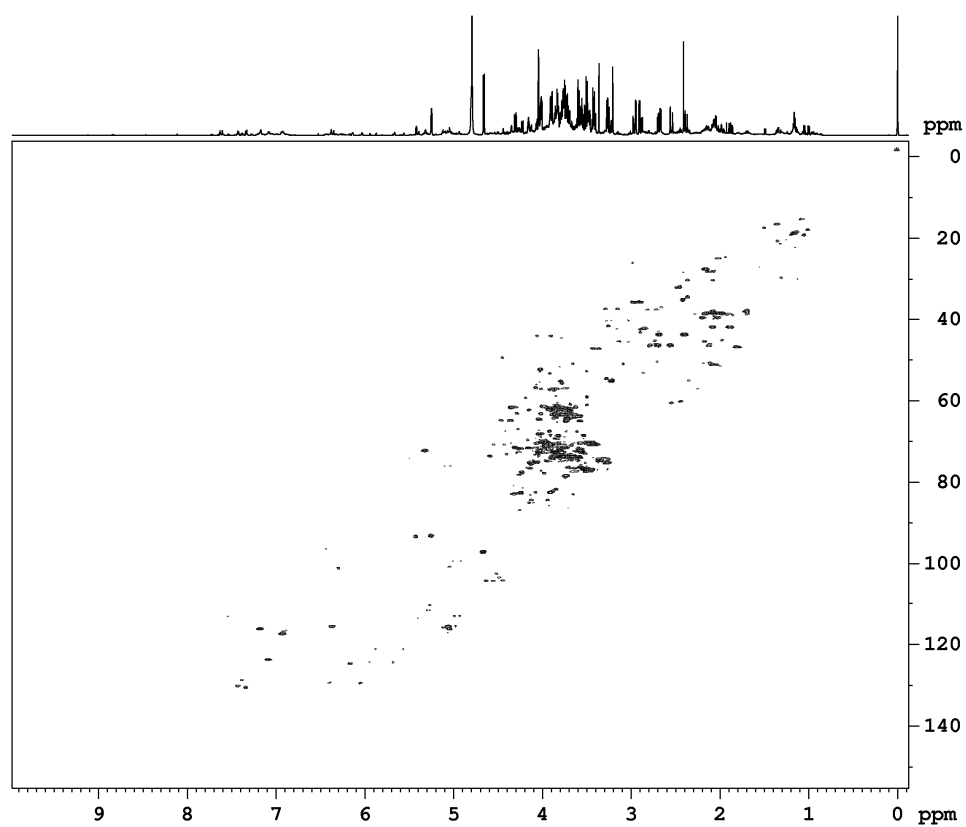

**Figure S2.** The  $^1\text{H}$ - $^{13}\text{C}$  HSQC NMR 2D map of globe artichoke leaves aqueous extract.

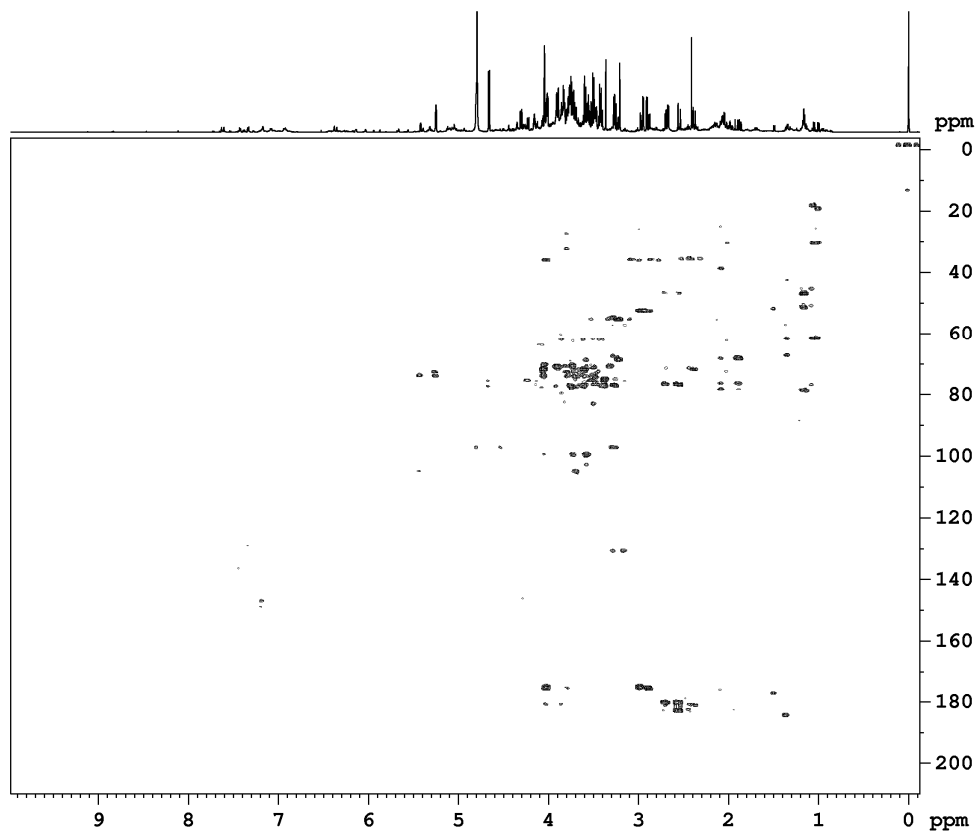

**Figure S3.** The  $^1\text{H}$ - $^{13}\text{C}$  HMBC NMR 2D map of globe artichoke leaves aqueous extract.

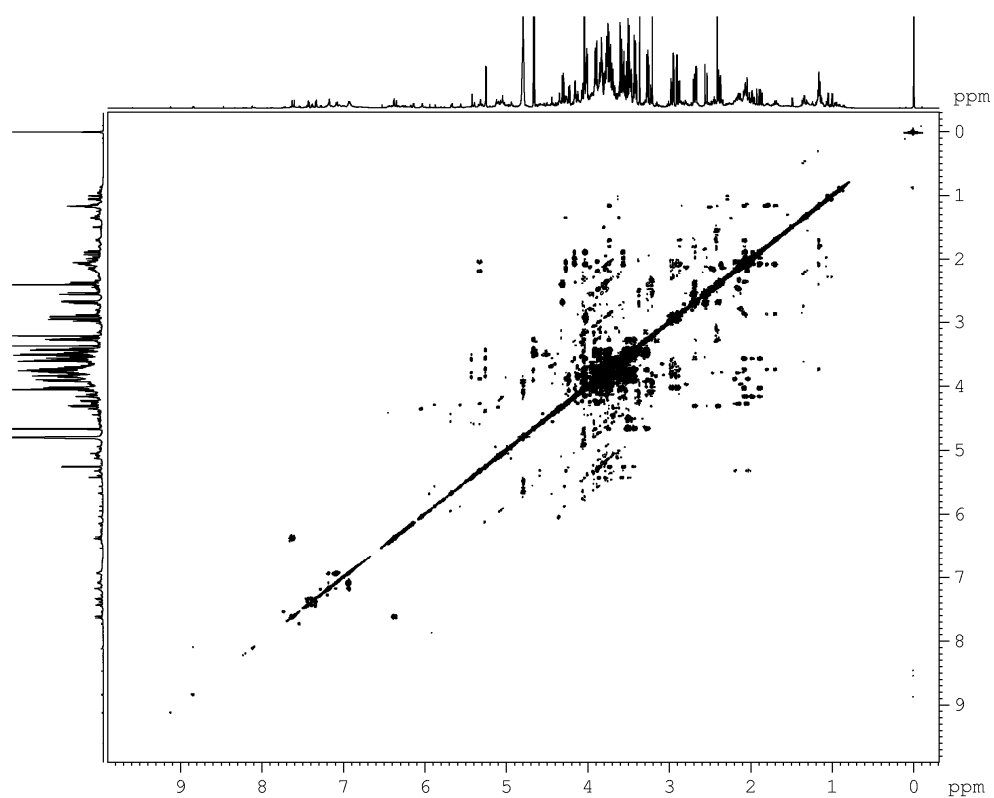

**Figure S4.** The <sup>1</sup>H-<sup>1</sup>H TOCSY NMR 2D map of globe artichoke leaves aqueous extract.

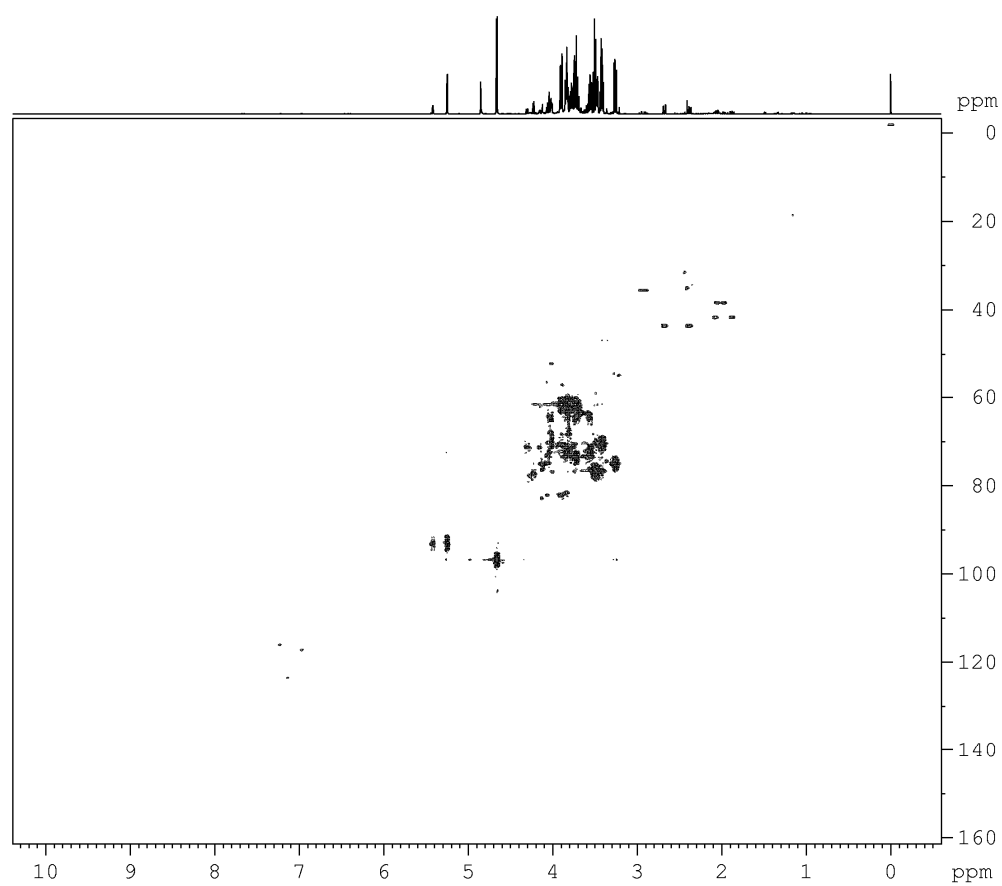

**Figure S5.** The <sup>1</sup>H-<sup>13</sup>C HSQC NMR 2D map of globe artichoke stalks aqueous extract.

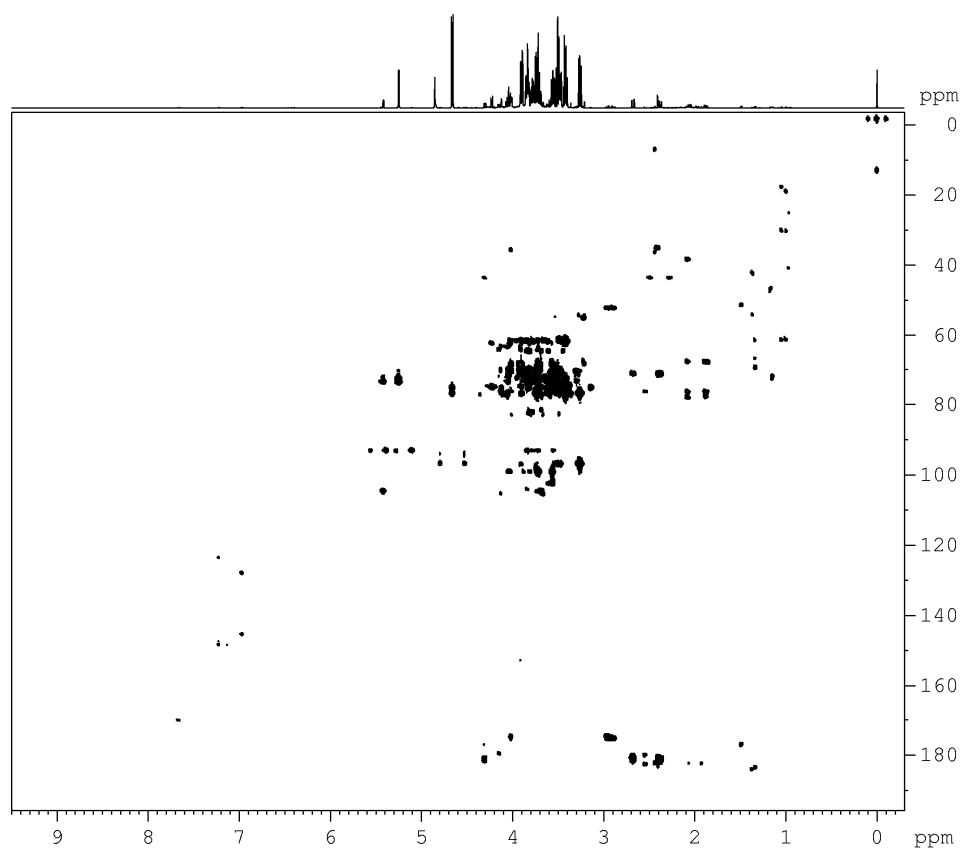

**Figure S6.** The  $^1\text{H}$ - $^{13}\text{C}$  HMBC NMR 2D map of globe artichoke stalks aqueous extract.

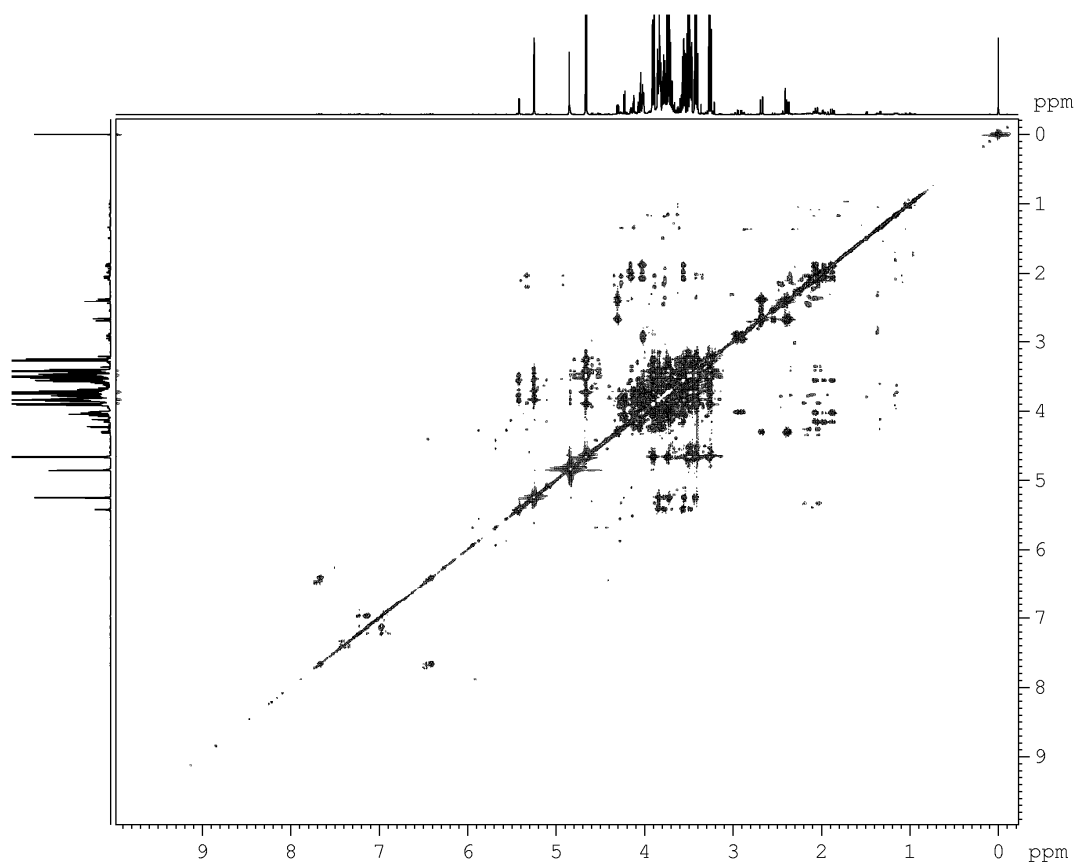

**Figure S7.** The  $^1\text{H}$ - $^1\text{H}$  TOCSY NMR 2D map of globe artichoke stalks aqueous extract.

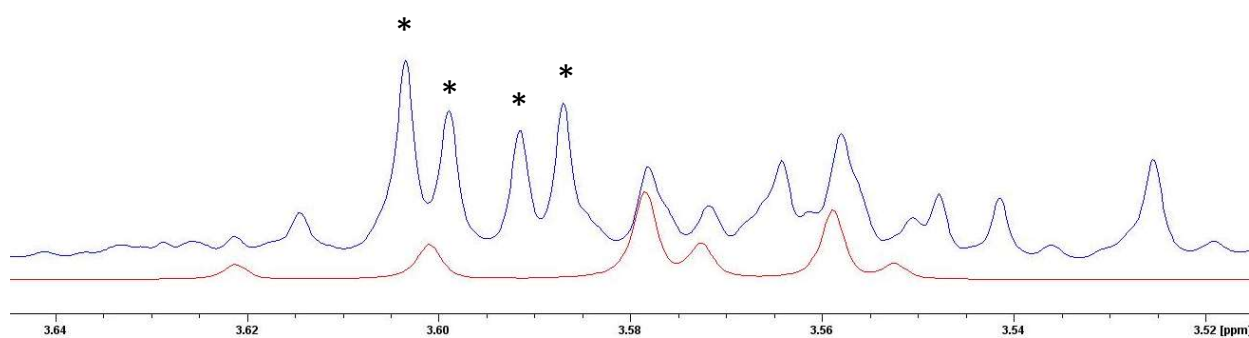

**Figure S8.** The 3.64 -3.52 ppm  $^1\text{H}$  NMR spectral region of globe artichoke leaves aqueous extract (blue) in comparison with fructose  $^1\text{H}$  NMR spectrum (red trace). Asterisks indicate the components of the *chiro*-inositol multiplet signal.

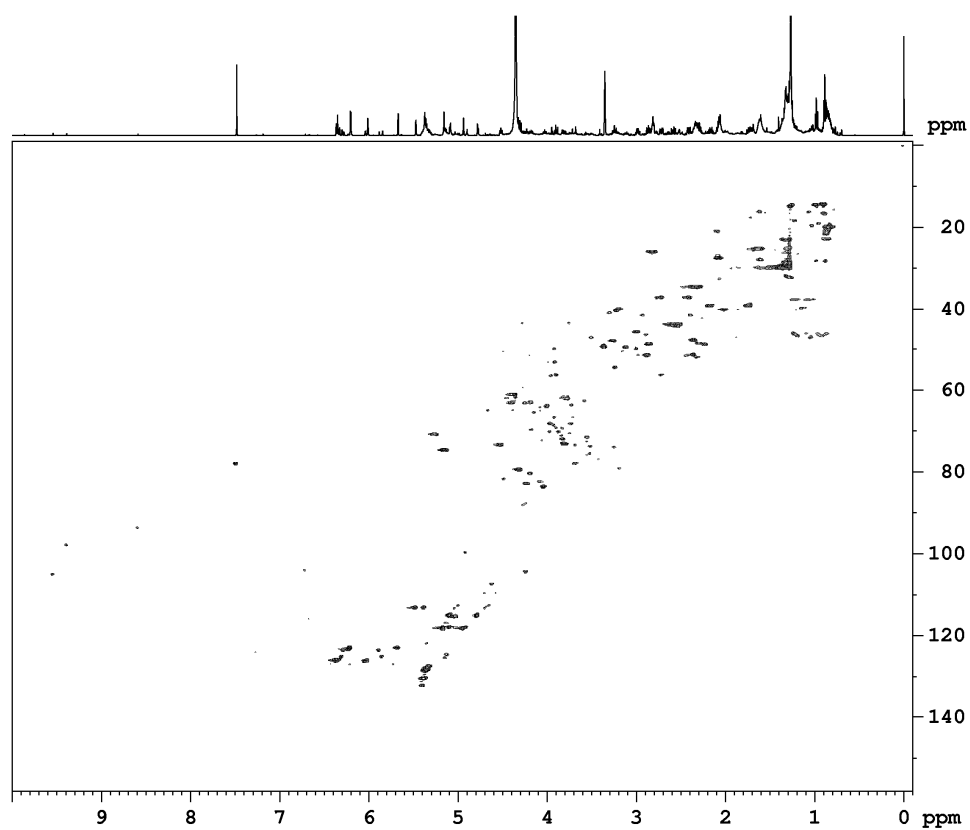

**Figure S9.** The  $^1\text{H}$ - $^{13}\text{C}$  HSQC NMR 2D map of globe artichoke leaves chloroform extract.

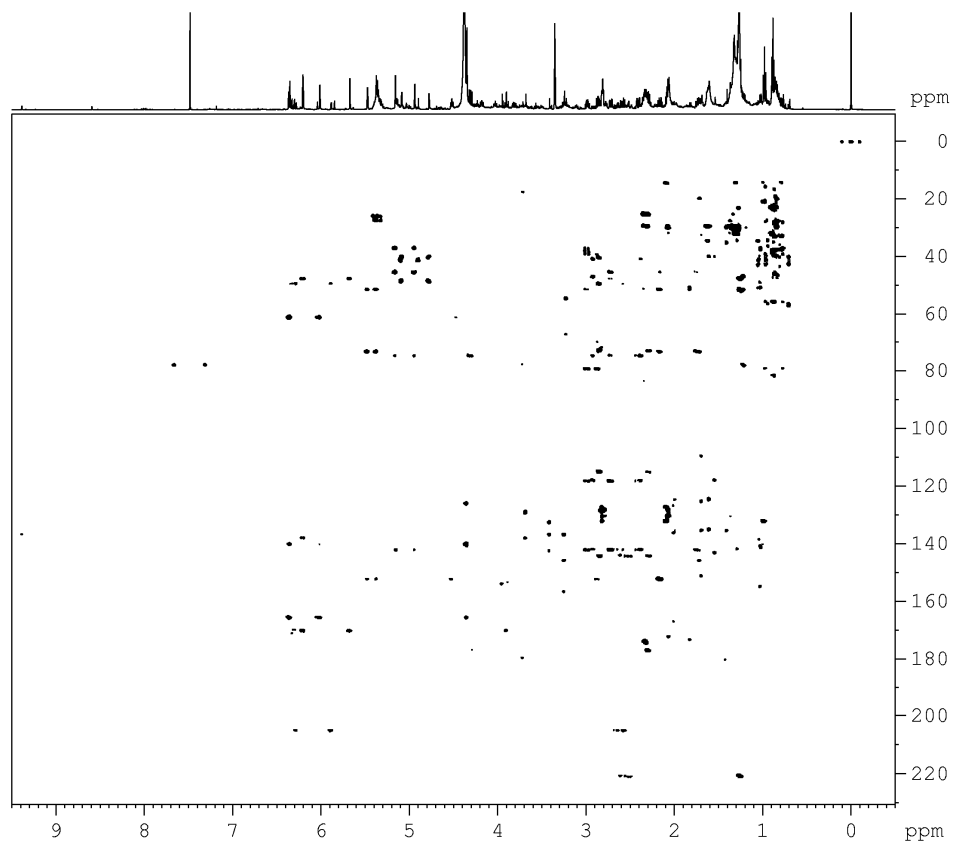

**Figure S10.** The  $^1\text{H}$ - $^{13}\text{C}$  HMBC NMR 2D map of globe artichoke leaves chloroform extract.

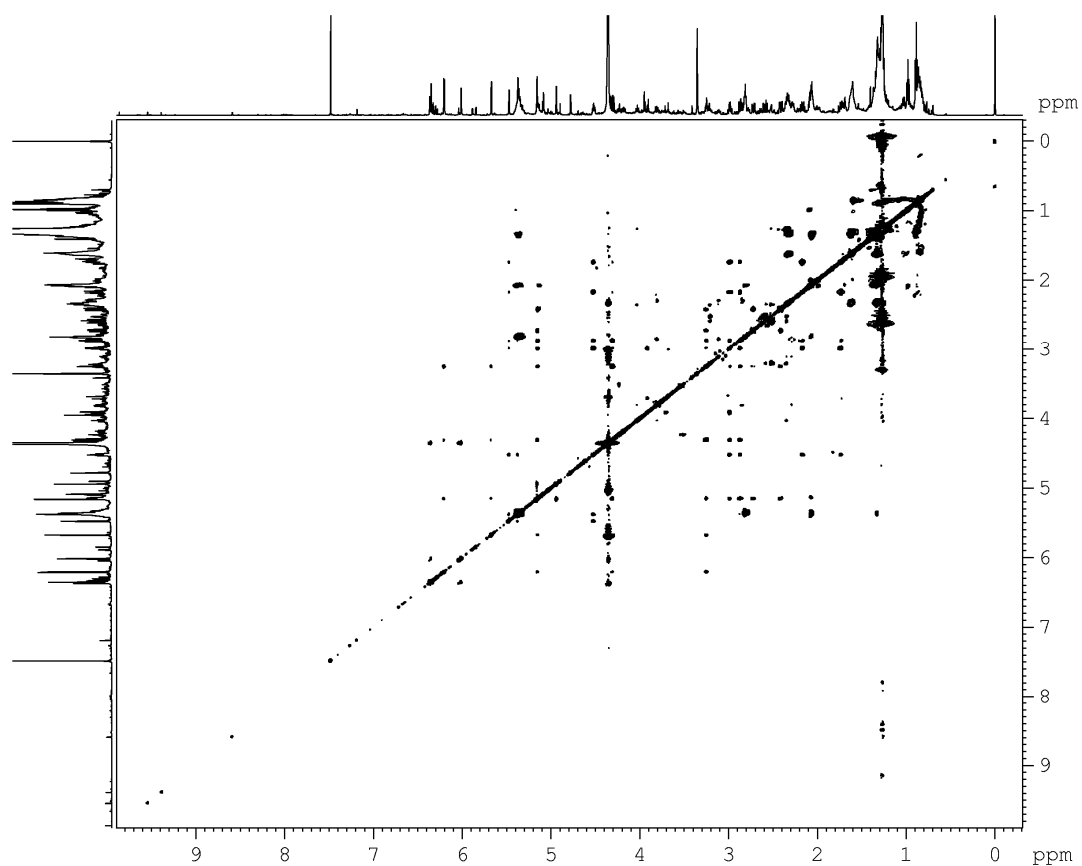

**Figure S11.** The  $^1\text{H}$ - $^1\text{H}$  TOCSY NMR 2D map of globe artichoke leaves chloroform extract.

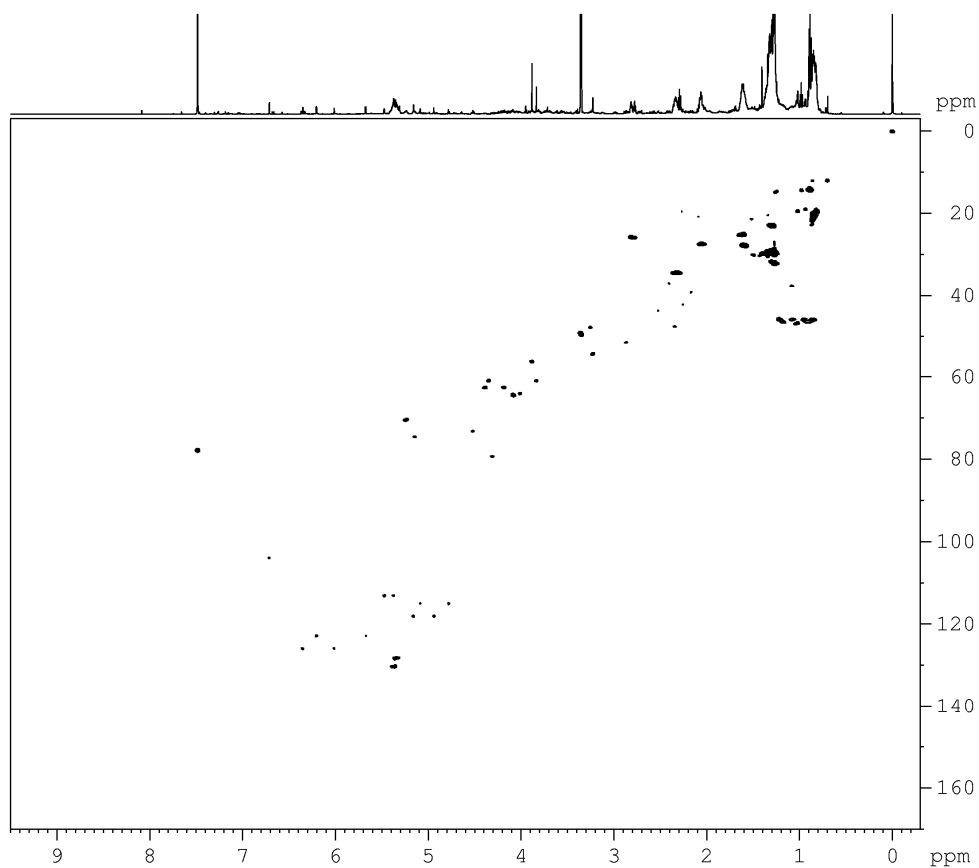

**Figure S12.** The  $^1\text{H}$ - $^{13}\text{C}$  HSQC NMR 2D map of globe artichoke stalks chloroform extract.

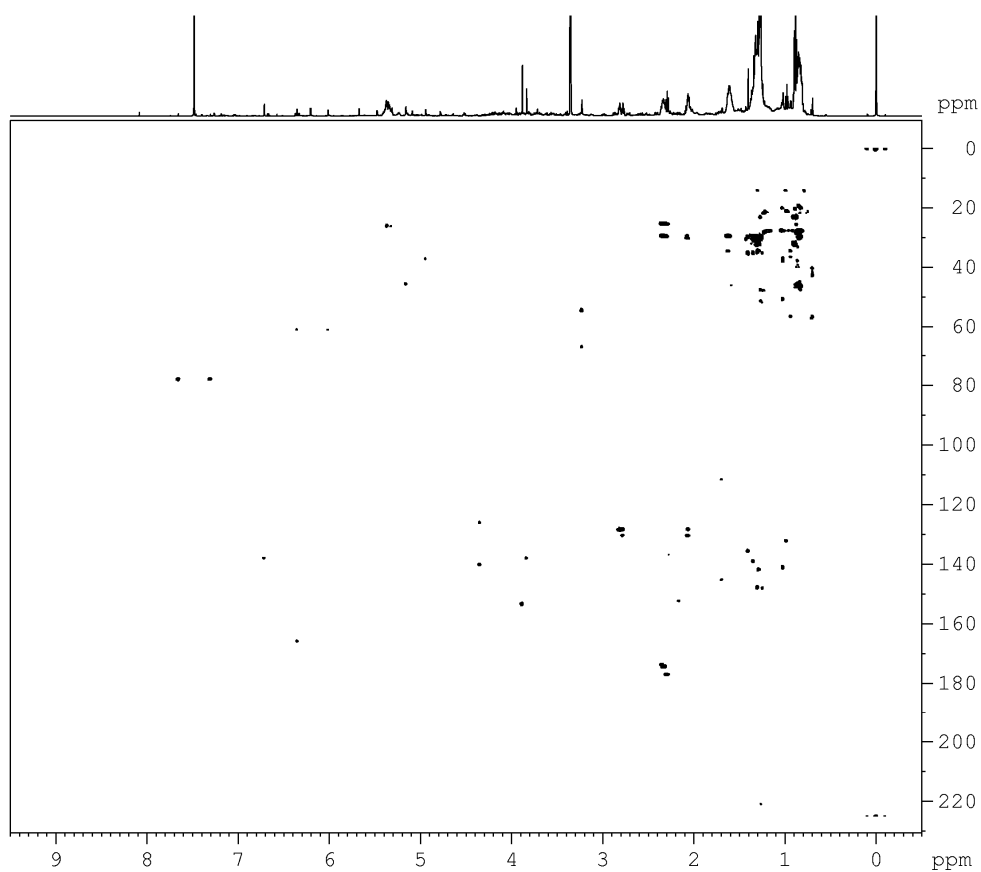

**Figure S13.** The  $^1\text{H}$ - $^{13}\text{C}$  HMBC NMR 2D map of globe artichoke stalks chloroform extract.

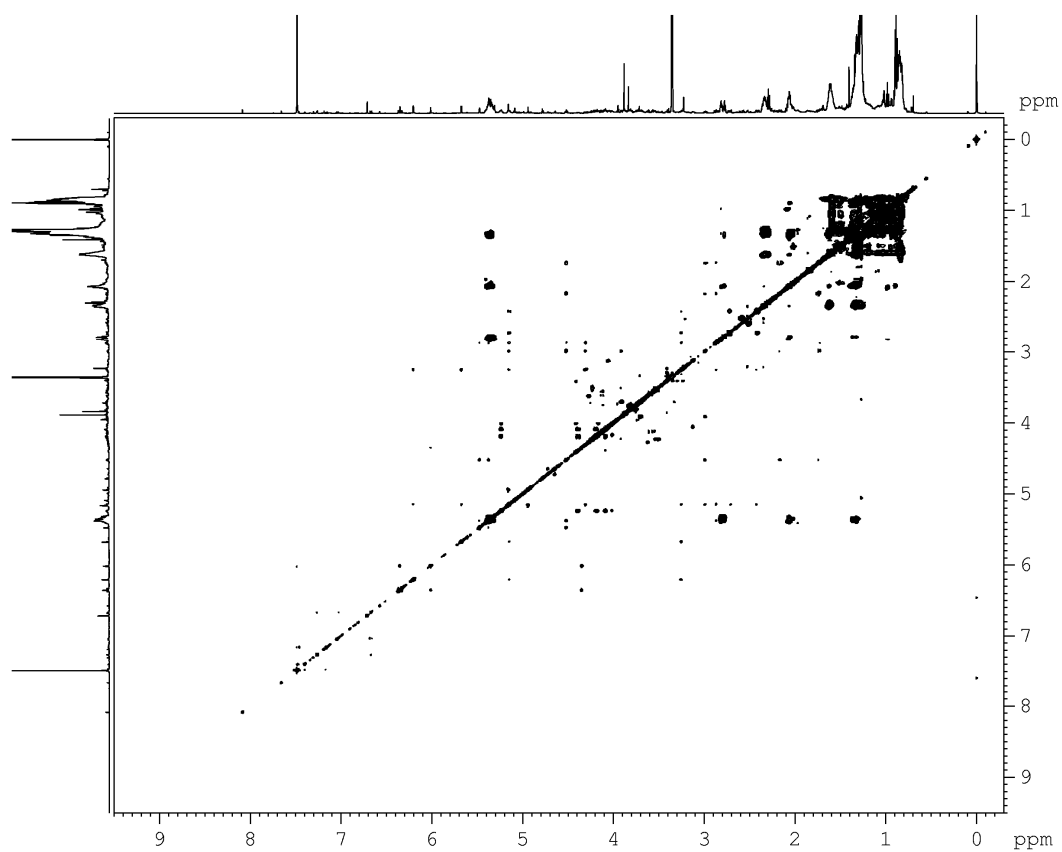

**Figure S14.** The  $^1\text{H}$ - $^1\text{H}$  TOCSY NMR 2D map of globe artichoke stalks chloroform extract.

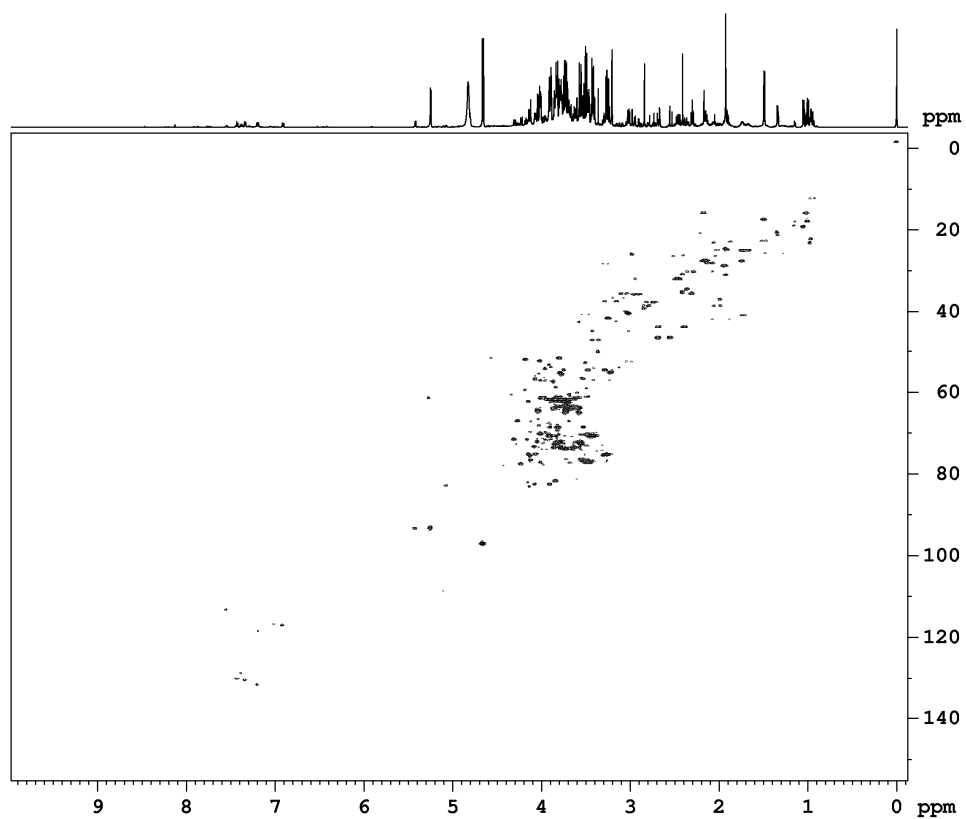

**Figure S15.** The  $^1\text{H}$ - $^{13}\text{C}$  HSQC NMR 2D map of cauliflower leaves aqueous extract.

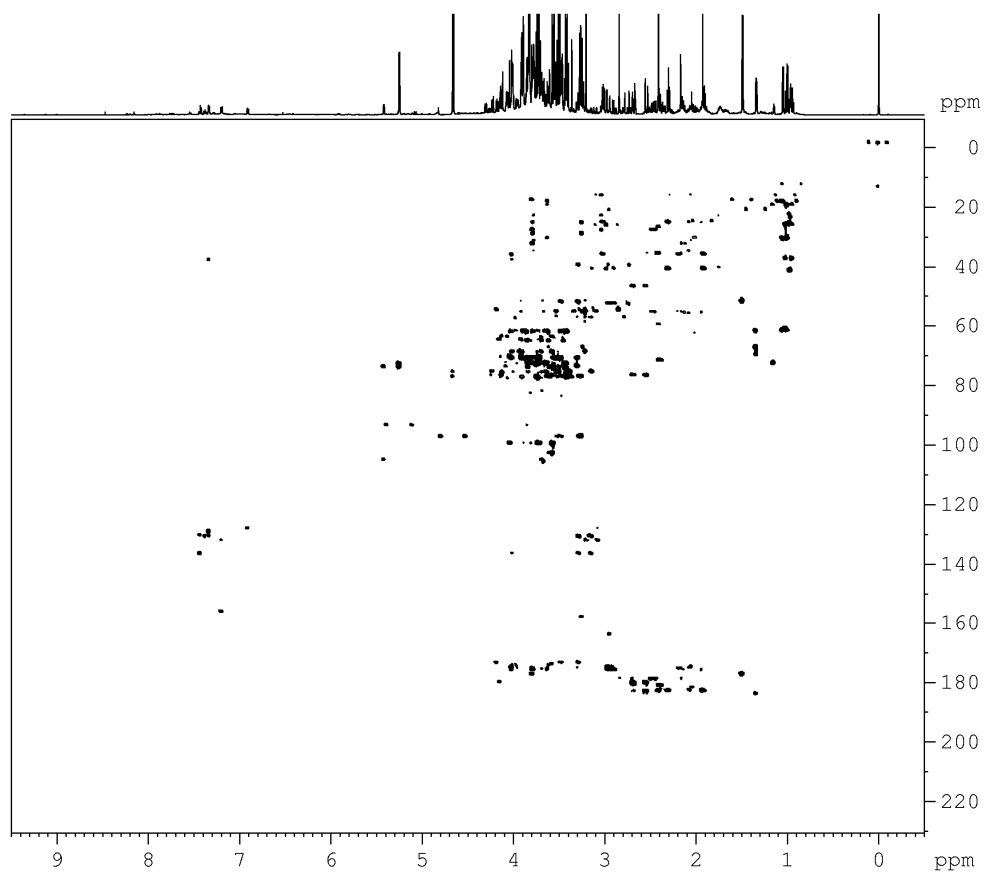

**Figure S16.** The  $^1\text{H}$ - $^{13}\text{C}$  HMBC NMR 2D map of cauliflower leaves aqueous extract.

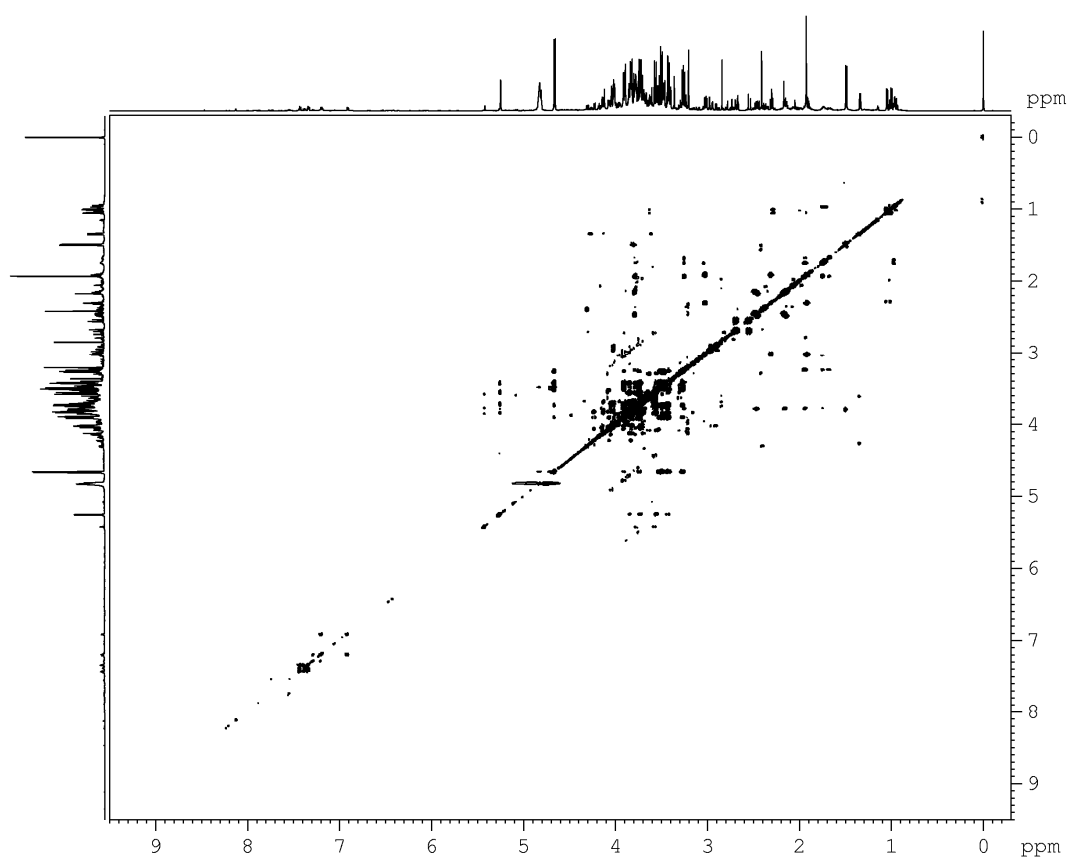

**Figure S17.** The  $^1\text{H}$ - $^1\text{H}$  TOCSY NMR 2D map of cauliflower leaves aqueous extract.

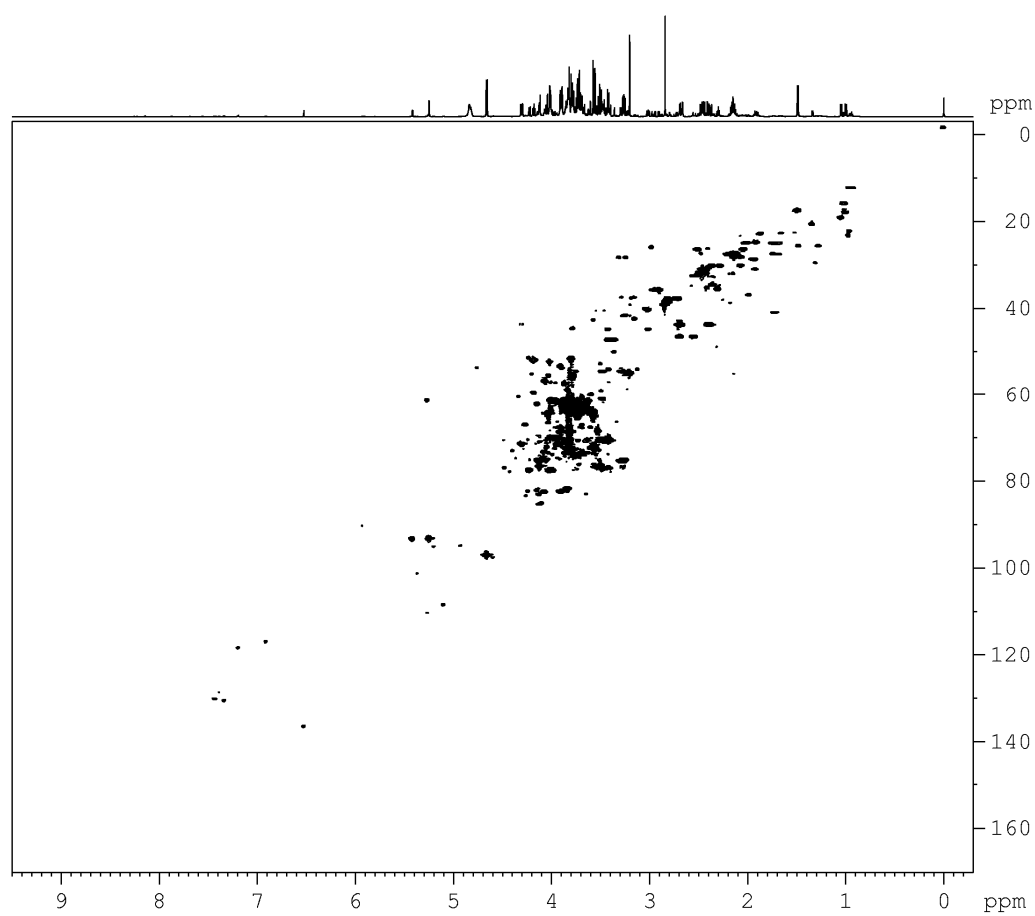

**Figure S18.** The  $^1\text{H}$ - $^{13}\text{C}$  HSQC NMR 2D map of cauliflower florets aqueous extract.

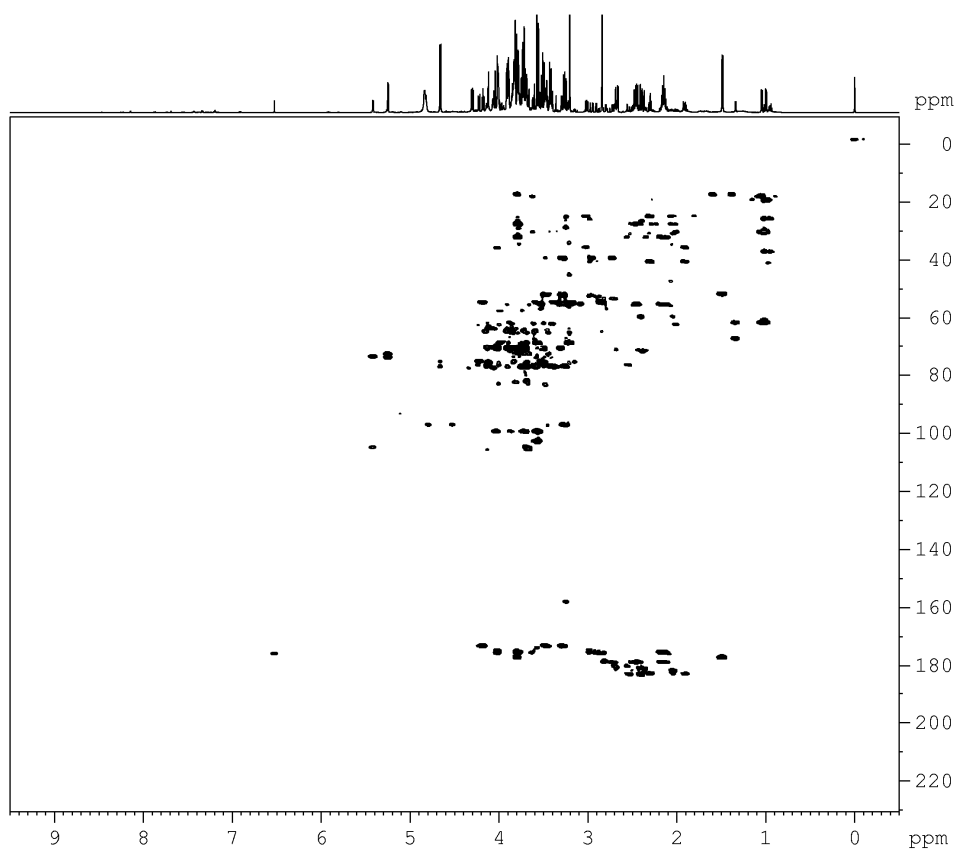

**Figure S19.** The  $^1\text{H}$ - $^{13}\text{C}$  HMBC NMR 2D map of cauliflower florets aqueous extract.

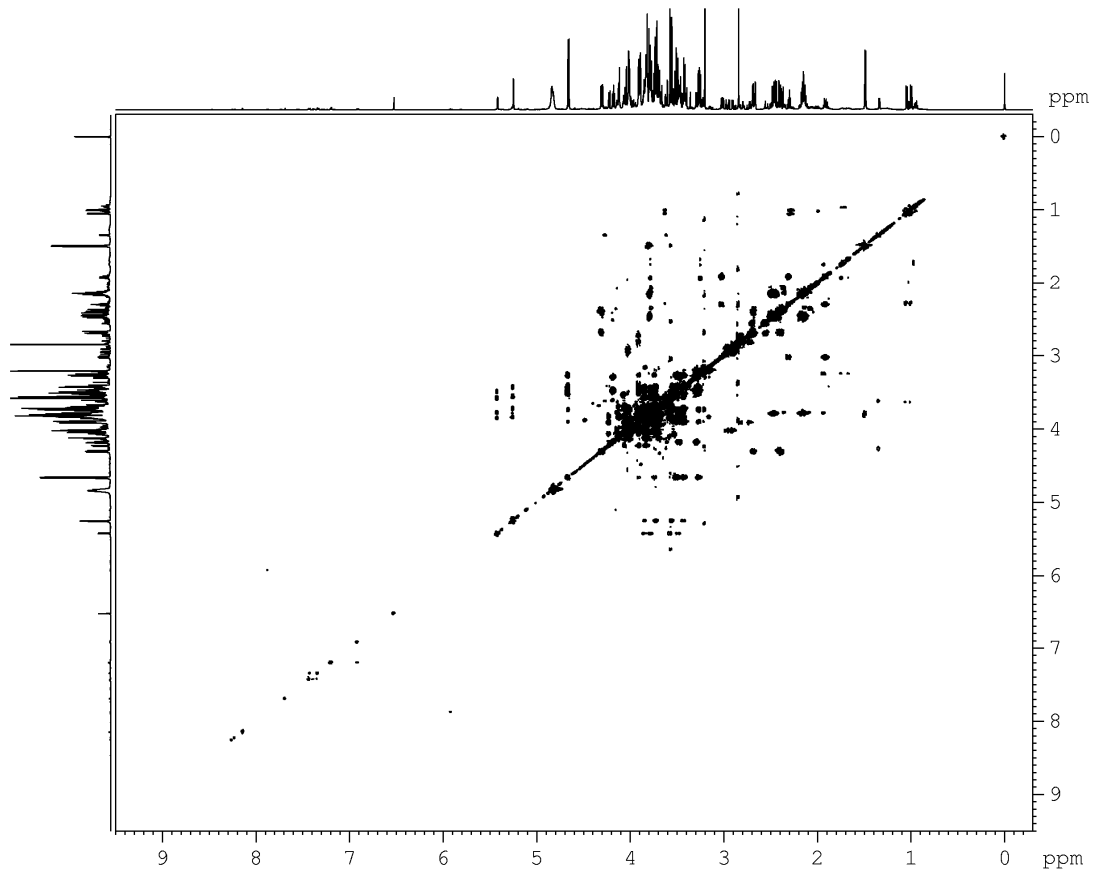

**Figure S20.** The  $^1\text{H}$ - $^1\text{H}$  TOCSY NMR 2D map of cauliflower florets aqueous extract.

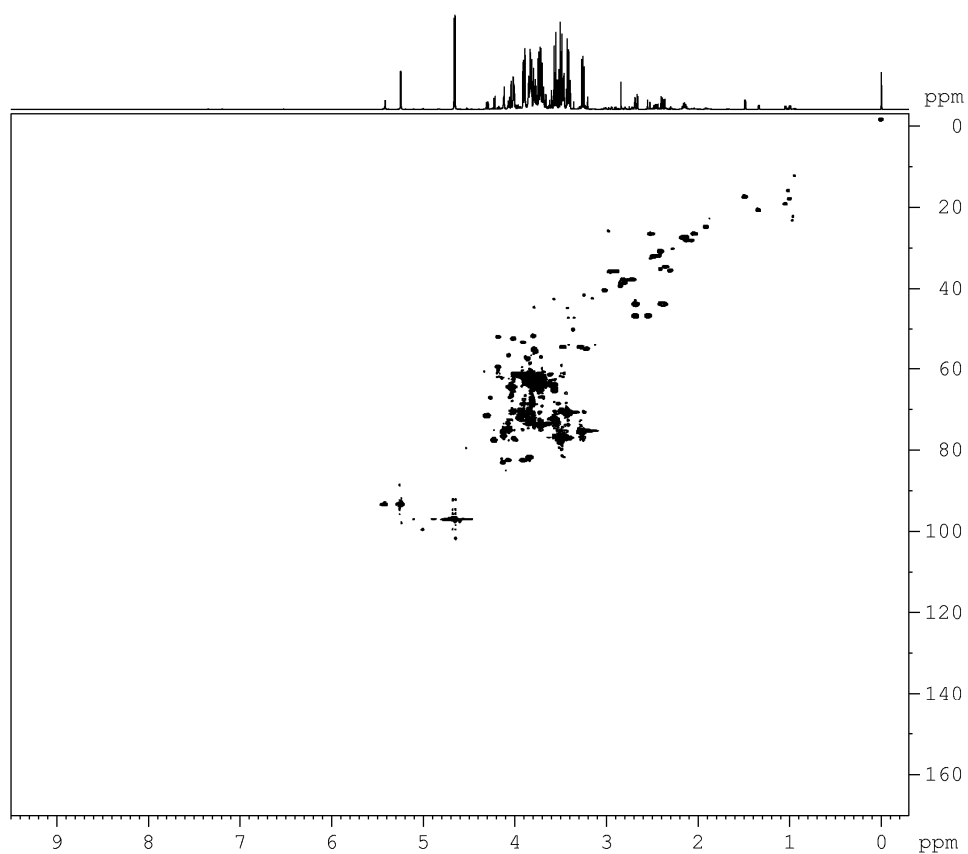

**Figure S21.** The  $^1\text{H}$ - $^{13}\text{C}$  HSQC NMR 2D map of cauliflower stalks aqueous extract.

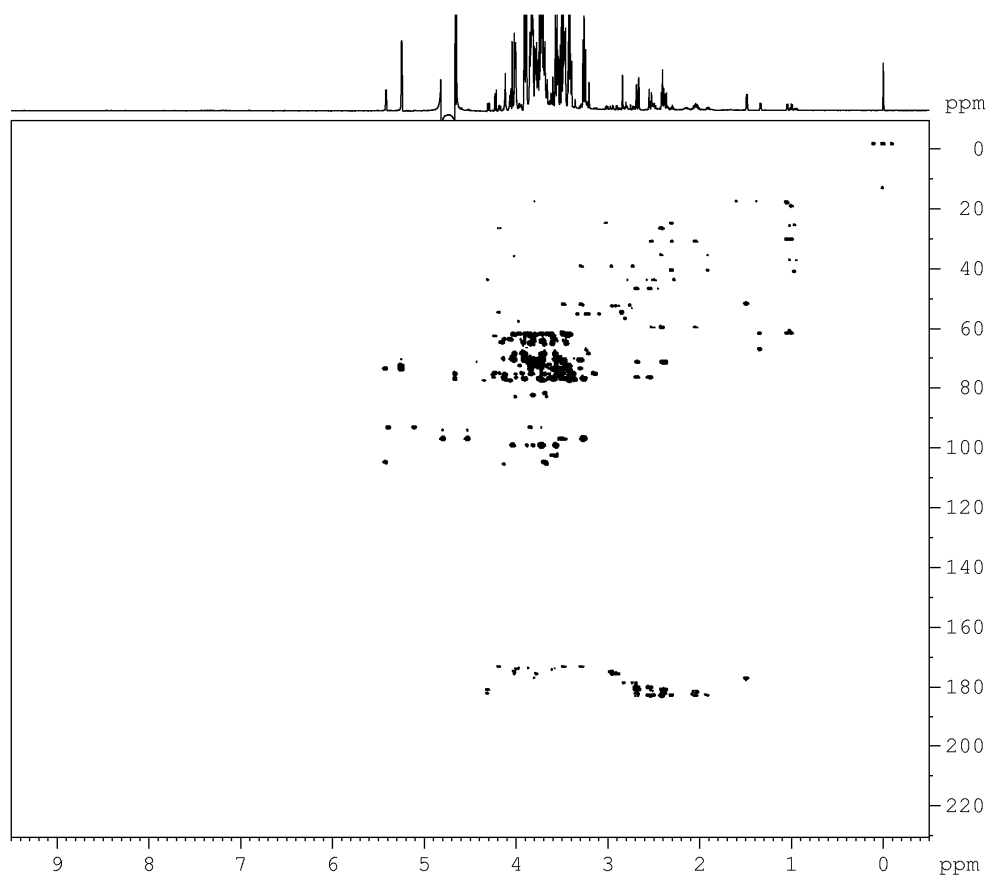

**Figure S22.** The  $^1\text{H}$ - $^{13}\text{C}$  HMBC NMR 2D map of cauliflower stalks aqueous extract.

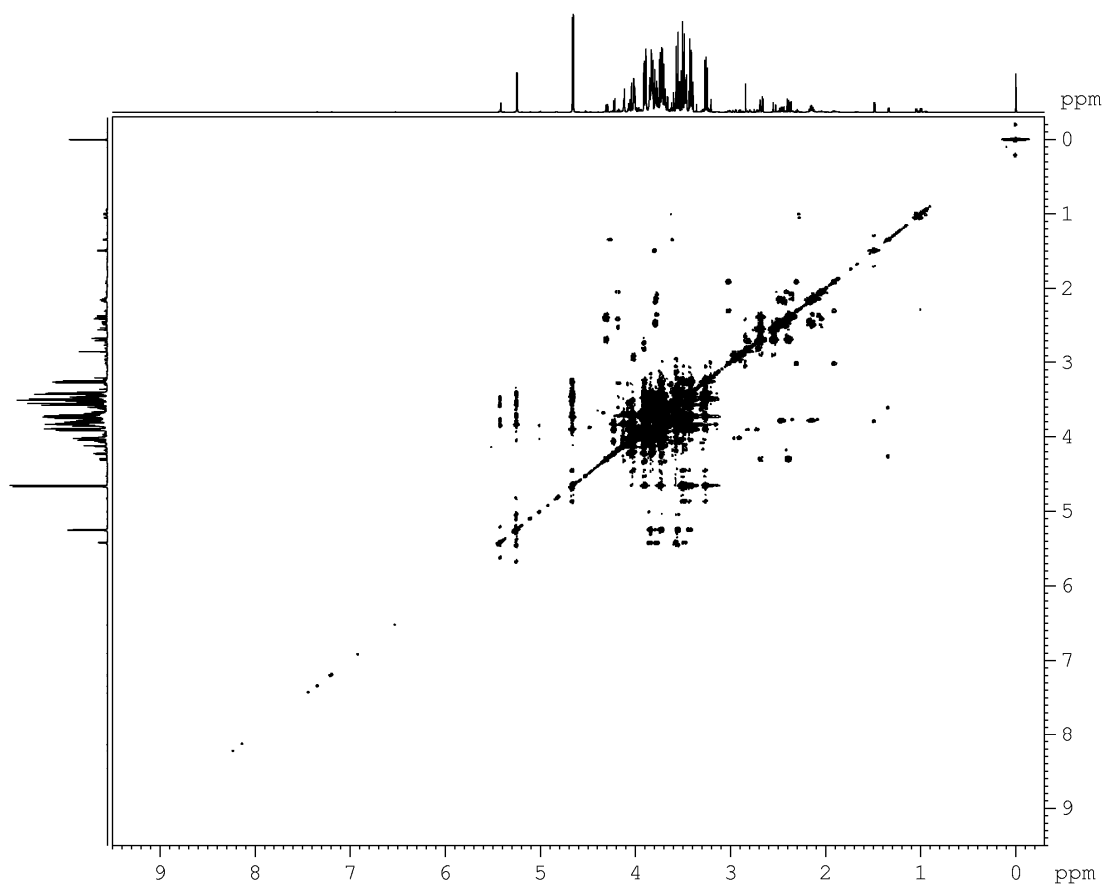

**Figure S23.** The  $^1\text{H}$ - $^1\text{H}$  TOCSY NMR 2D map of cauliflower stalks aqueous extract.

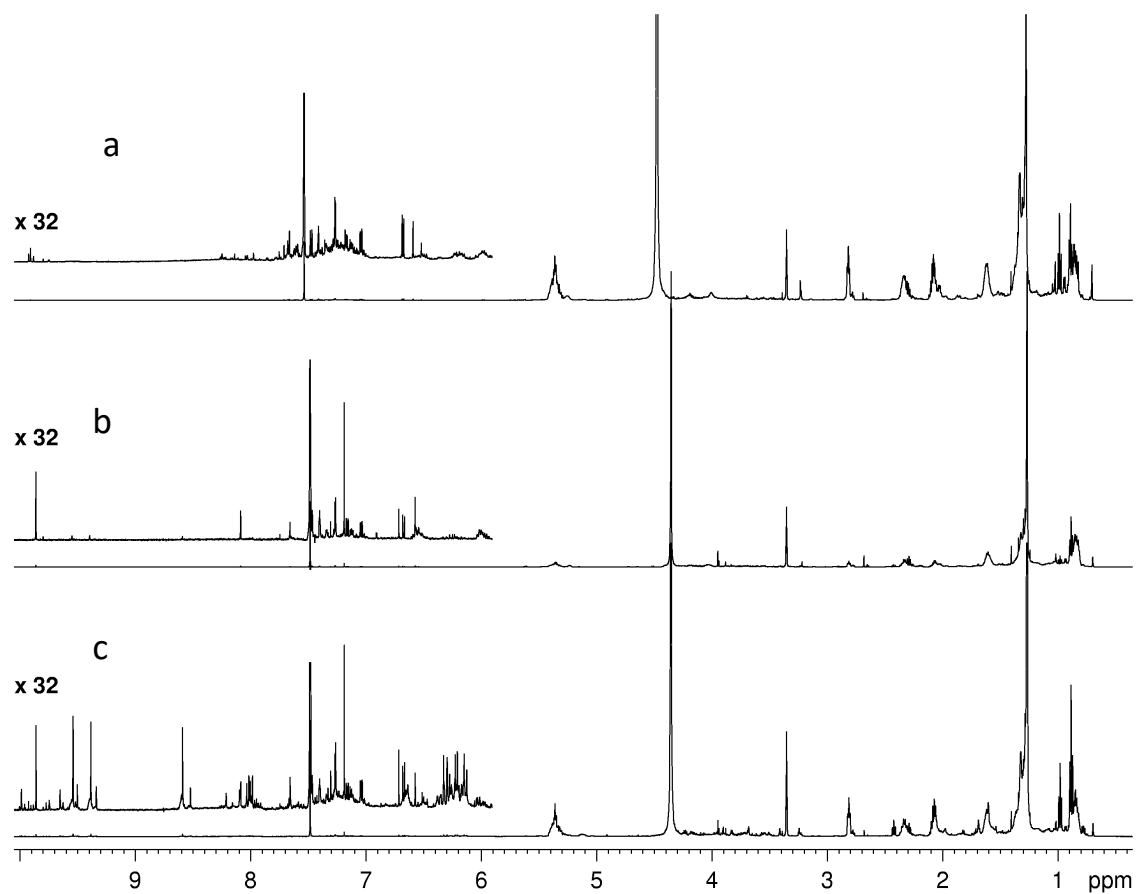

**Figure S24.**  $^1\text{H}$  NMR spectra of cauliflower florets (a), stalks (b) and leaves (c) chloroform extracts. Solvent:  $\text{CDCl}_3/\text{CD}_3\text{OD}$  2:1 v/v.

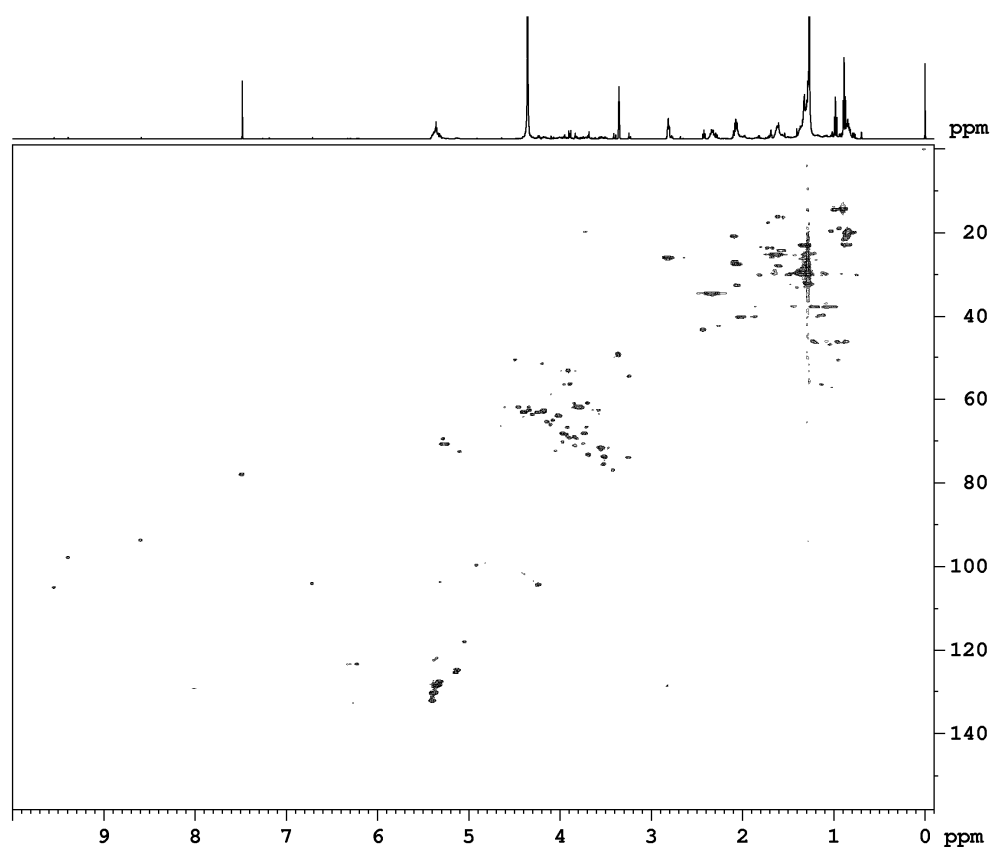

**Figure S25.** The  $^1\text{H}$ - $^{13}\text{C}$  HSQC NMR 2D map of cauliflower leaves chloroform extract.

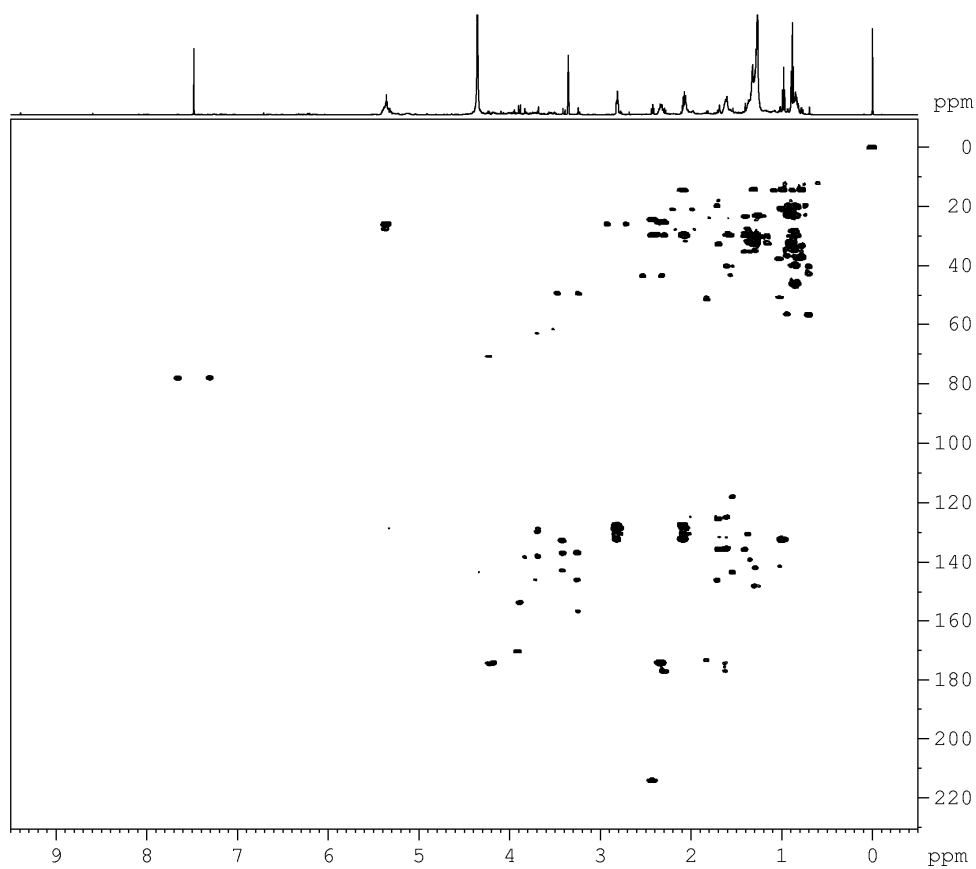

**Figure S26.** The  $^1\text{H}$ - $^{13}\text{C}$  HMBC NMR 2D map of cauliflower leaves chloroform extract.

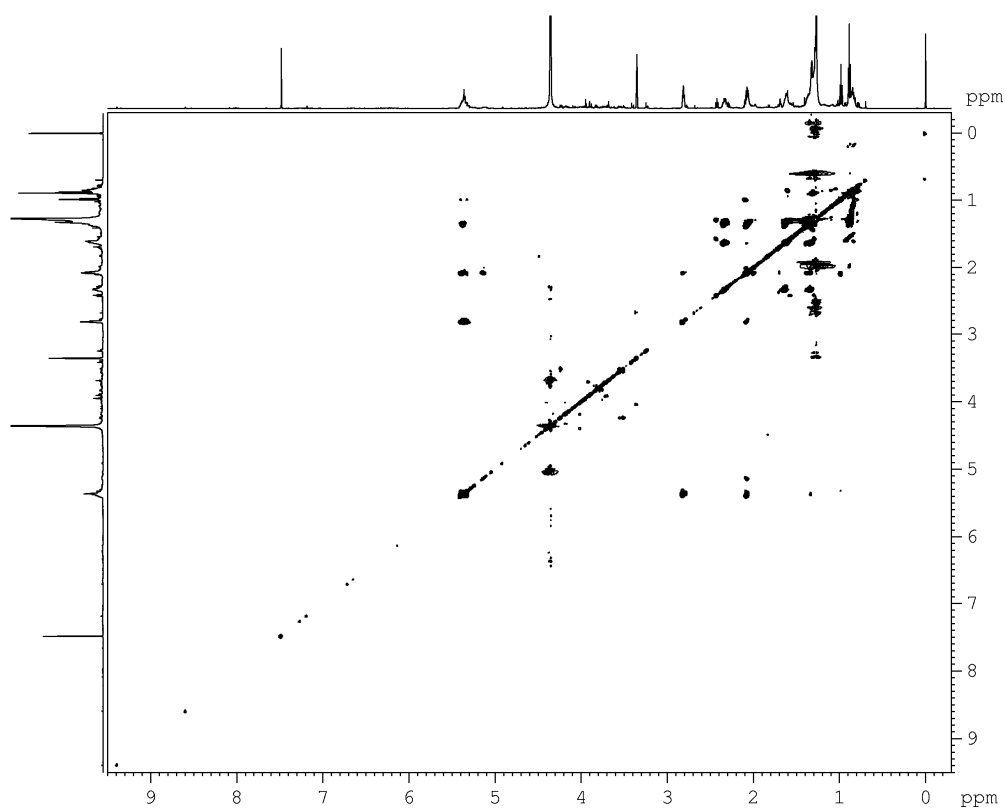

**Figure S27.** The  $^1\text{H}$ - $^1\text{H}$  TOCSY NMR 2D map of cauliflower leaves chloroform extract.

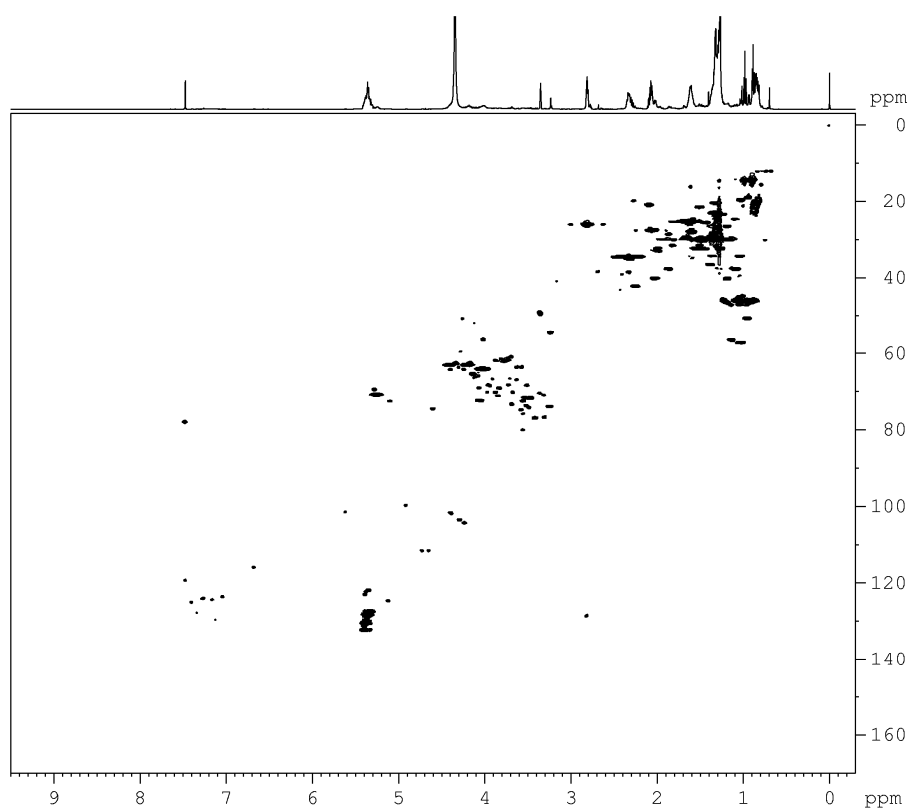

**Figure S28.** The  $^1\text{H}$ - $^{13}\text{C}$  HSQC NMR 2D map of cauliflower florets chloroform extract.

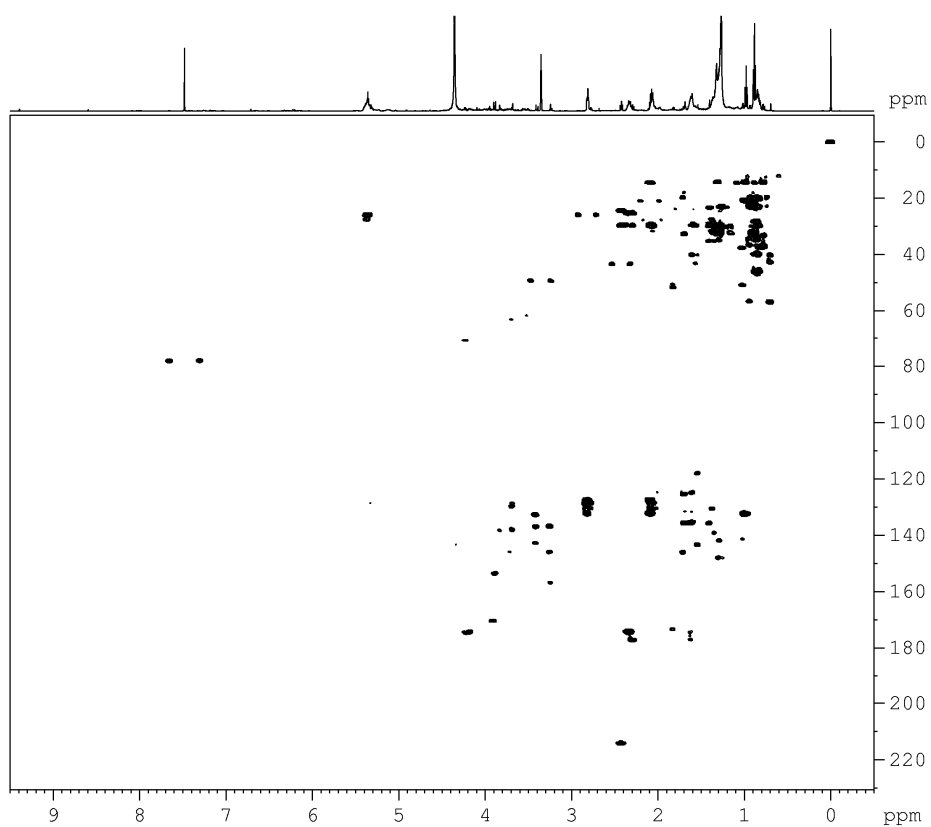

**Figure S29.** The  $^1\text{H}$ - $^{13}\text{C}$  HMBC NMR 2D map of cauliflower florets chloroform extract.

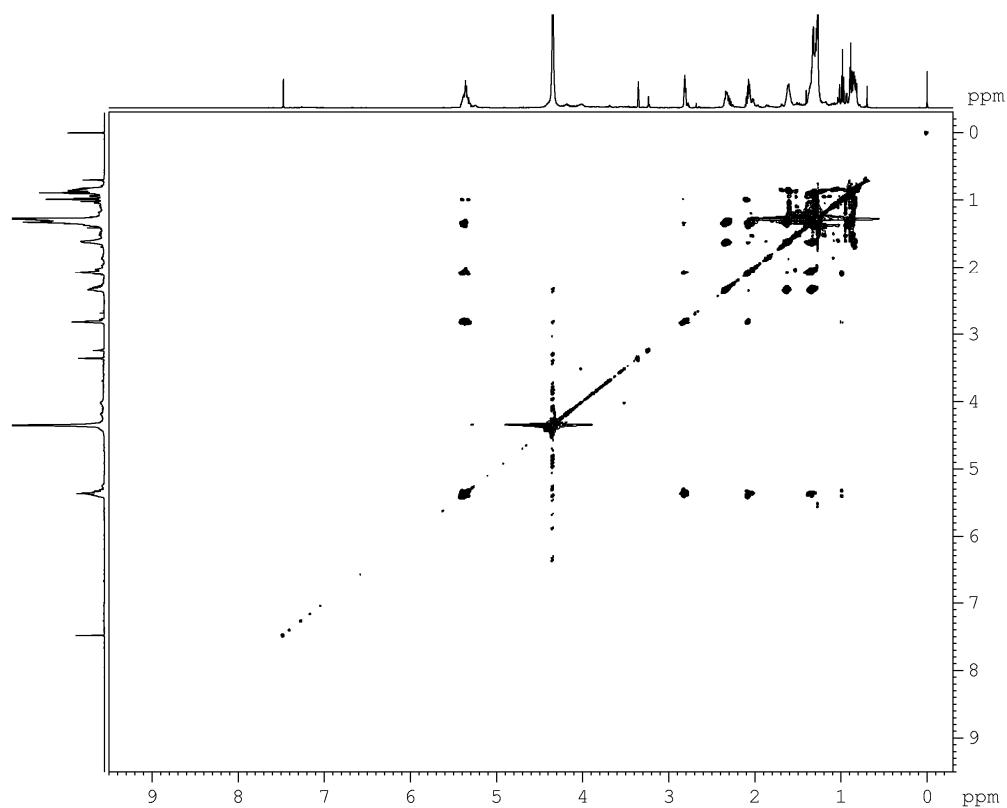

**Figure S30.** The  $^1\text{H}$ - $^1\text{H}$  TOCSY NMR 2D map of cauliflower florets chloroform extract.

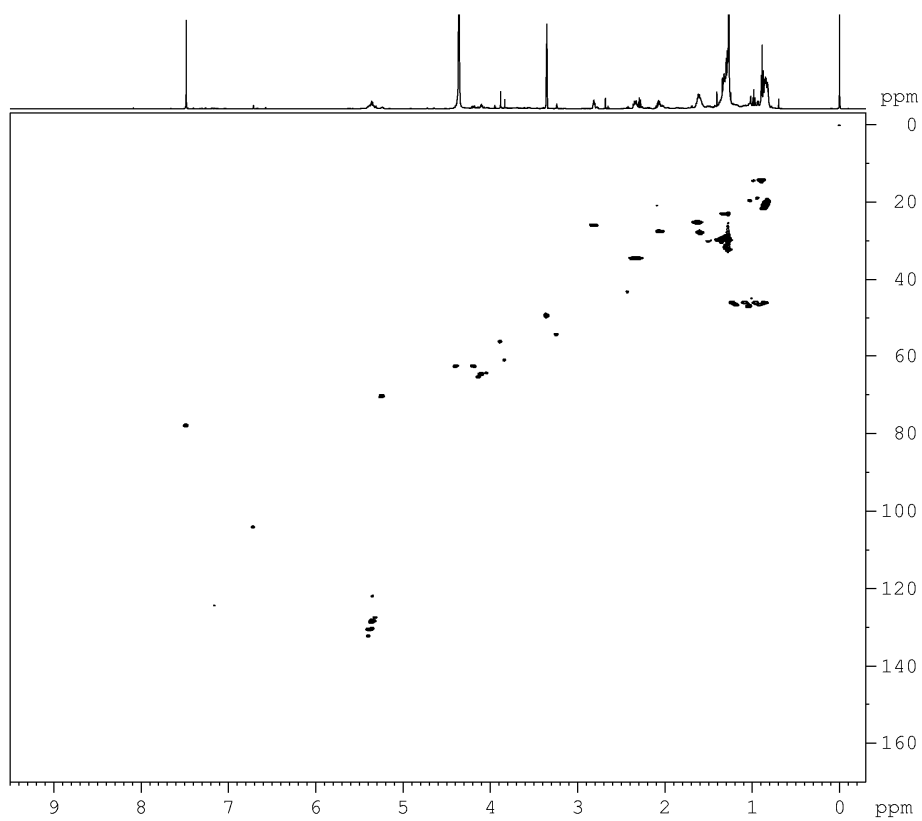

**Figure S31.** The  $^1\text{H}$ - $^{13}\text{C}$  HSQC NMR 2D map of cauliflower stalks chloroform extract.

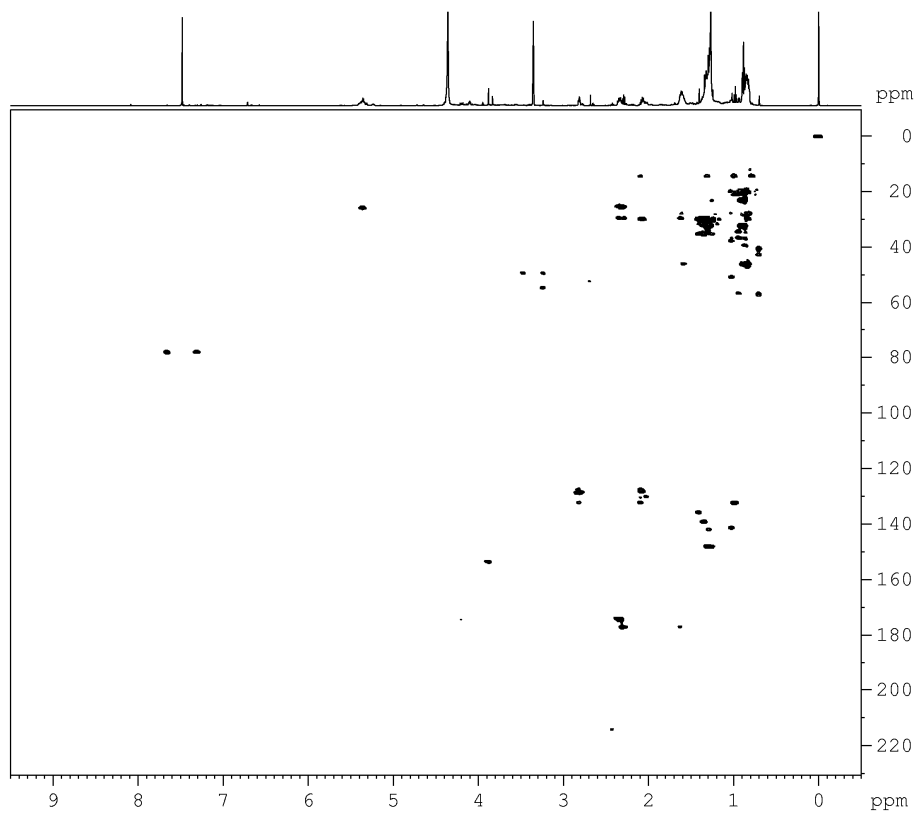

**Figure S32.** The  $^1\text{H}$ - $^{13}\text{C}$  HMBC NMR 2D map of cauliflower stalks chloroform extract.

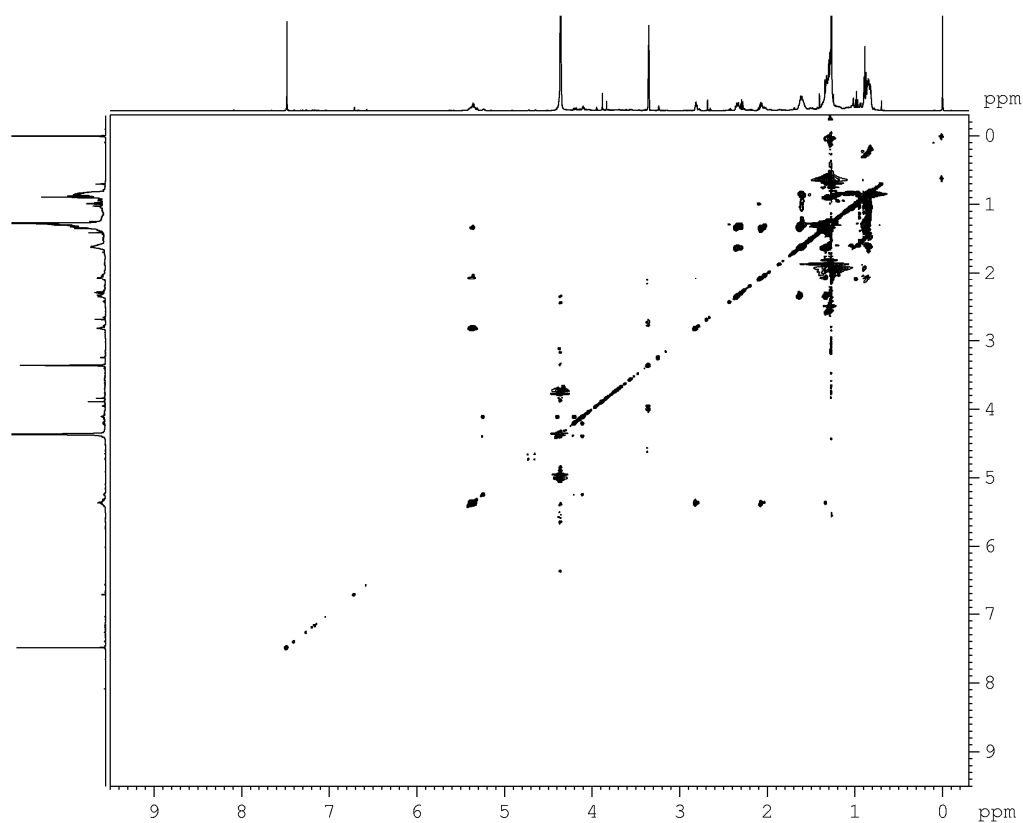

**Figure S33.** The  $^1\text{H}$ - $^1\text{H}$  TOCSY NMR 2D map of cauliflower stalks chloroform extract.
